# Supplementary material for: A Randomized Controlled Trial of Ethyl Glucuronide-Based Contingency Management for Outpatients With Co-Occurring Alcohol Use Disorders and Serious Mental Illness
Source: Atypon-hosted journal article supplement (doi:10.1176/appi.ajp.2016.16050627), 2017-01-31

## Supplemental Materials

**TABLE S1. Multiple Imputation Results for Primary and Secondary Outcomes During the Intervention and Postintervention Follow-Up Time Periods (N=79)<sup>a</sup>**

| Outcome Variable                                               | Intervention      |                         | Follow-Up         |                      |
|----------------------------------------------------------------|-------------------|-------------------------|-------------------|----------------------|
|                                                                | Estimate          | 95% CI                  | Estimate          | 95% CI               |
|                                                                | <b>Odds Ratio</b> |                         | <b>Odds Ratio</b> |                      |
| % Alcohol negative urine sample <sup>b</sup>                   | <b>2.86</b>       | <b>2.12 to 3.87</b>     | 2.60              | 0.97 to 6.93         |
|                                                                | <b>B</b>          |                         | <b>B</b>          |                      |
| Ethyl glucuronide value (ng/mL) <sup>c</sup>                   | <b>325.70</b>     | <b>223.86 to 427.53</b> | 283.27            | -58.84 to 625.18     |
| Self-reported days of alcohol use in the last 30 days          | <b>7.22</b>       | <b>3.30 to 11.14</b>    | <b>7.21</b>       | <b>3.30 to 11.14</b> |
| Self-reported days of alcohol intoxication in the last 30 days | <b>4.58</b>       | <b>0.18 to 8.99</b>     | <b>5.27</b>       | <b>2.30 to 8.24</b>  |
|                                                                | <b>Odds Ratio</b> |                         | <b>Odds Ratio</b> |                      |
| Self-reported % heavy drinking in the last 5 days              | <b>2.96</b>       | <b>2.09 to 4.18</b>     | <b>4.11</b>       | <b>1.54 to 10.93</b> |
| % Stimulant negative urine tests                               | <b>2.79</b>       | <b>2:03 to 3.84</b>     | <b>2.99</b>       | <b>0.98 to 8.49</b>  |
|                                                                | <b>B</b>          |                         | <b>B</b>          |                      |
| Self-reported days of stimulant use in the last 30 days        | 1.86              | 0.66 to 5.09            | 2.89              | 0.98 to 8.49         |
|                                                                | <b>Odds Ratio</b> |                         | <b>Odds Ratio</b> |                      |
| % Smoking negative carbon monoxide samples (N=54)              | <b>2.62</b>       | <b>1.16 to 5.91</b>     | 5.58              | 0.46 to 67.92        |

<sup>a</sup> Bold text indicates statistically significant group differences (p<0.05).

<sup>b</sup> Alcohol negative urine sample equals an ethyl glucuronide level <150 ng/mL.

<sup>c</sup> Ethyl glucuronide immunoassay value ranging from 0 ng/mL to 2,000 ng/mL.

FIGURE S1. Study Consort Diagram

Note. The first five participants who were eligible for randomization were not randomized, rather, they were allocated to the contingency management condition to set the non-contingent group's draws (which were semi-yoked to the contingent group) for the first week of the study.

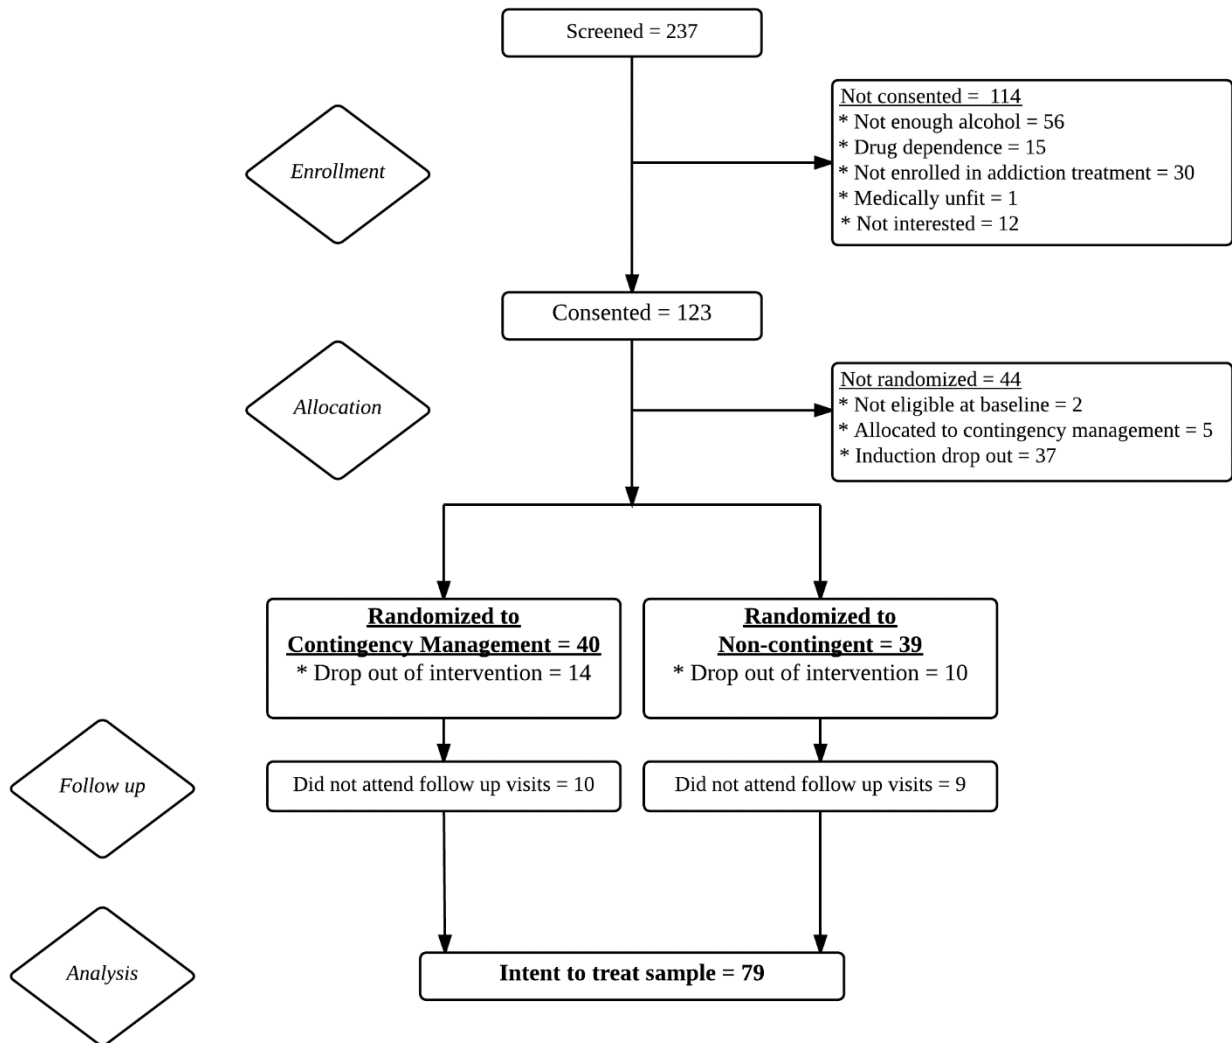

Supplement: appi.ajp.2016.16050627.ds001.pdf [file appi.ajp.2016.16050627.ds001.pdf]
